# Supplementary material for: Reconstruction of the biogeochemistry and ecology of photoautotrophs based on the nitrogen and carbon isotopic compositions of vanadyl porphyrins from Miocene siliceous sediments
Source: Copernicus journal article supplement (doi:10.5194/bg-5-797-2008), 2008-05-15
Supplement: Supplementary file 1 [file bg-5-797-2008-supplement.pdf]

## Supplementary materials

### (1) X-ray crystallography data

The molecular structures of six isolated porphyrins (including five compounds analyzed isotopically) were determined by X-ray crystallography. Crystals were prepared from 100–800  $\mu\text{g}$  of each isolated compound. Dark-red colored crystals of isolated individual vanadyl porphyrins were grown by vapor diffusion (methanol into  $\text{CHCl}_3$  solution). Single crystals of various dimensions (as small as  $0.1 \times 0.1 \times 0.02$  mm) were subjected to X-ray diffraction analyses. Measurements were made on a Rigaku RAXIS RAPID imaging plate area detector with graphite monochromated Cu– $K\alpha$  radiation.

We obtained conclusive crystallographic information for compounds **1a**, **1b**, **1c**, **1d**, and **1e**, which were determined to be deoxophylloerythroetioporphyrin (DPEP), 3-methyl-DPEP, 3-nor-DPEP, 8-nor-DPEP, and 17-nor-DPEP, respectively. Given that the structural information for DPEP (**1a**) and 8-nor-DPEP (**1d**) is reported in Kashiyama et al. (in press) and Kashiyama et al. (2007b), respectively, we provide the crystallographic information for the other three compounds below.

## **Compound 1b**

$C_{31}H_{32}N_4OV$ , fw 527.56, crystal dimensions 0.20 x 0.10 x 0.03 mm, triclinic, space group P-1 (#2),  $a = 8.6340(4)$  Å,  $b = 12.6127(5)$  Å,  $c = 12.9031(5)$  Å,  $\alpha = 70.4199(17)^\circ$ ,  $\beta = 84.429(2)^\circ$ ,  $\gamma = 74.715(2)^\circ$ ,  $V = 1276.97(9)$  Å<sup>3</sup>,  $Z = 2$ , CuK $\alpha$  radiation ( $\lambda = 1.54187$  Å),  $D_{\text{calc}} = 1.372$  g cm<sup>-3</sup>,  $\mu(\text{CuK}\alpha) = 34.974$  cm<sup>-1</sup>, 12807 measured reflections, 4488 unique reflections [ $R_{\text{int}} = 0.072$ ], 4488 reflections included in the refinement,  $R1 = 0.1183$  [ $I > 2.00 \sigma(I)$ ],  $wR2 = 0.3838$  (all reflections). Crystallographic data for the structural analysis have been deposited with the Cambridge Crystallographic Data Centre (CCDC No. 668113). This information can be obtained free of charge from [www.ccdc.cam.ac.uk](http://www.ccdc.cam.ac.uk).

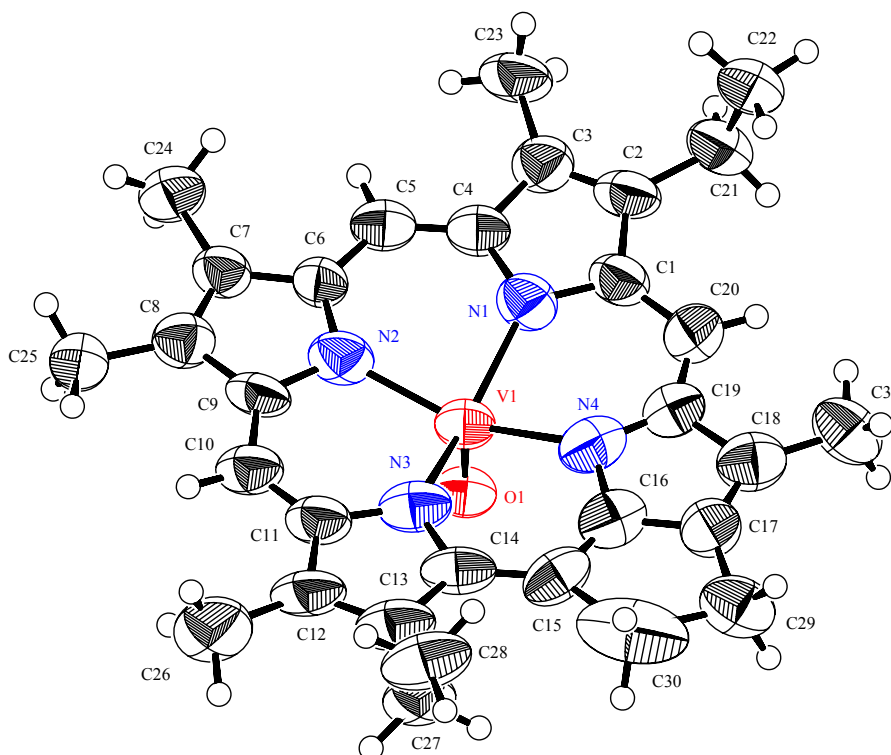

## **Compound 1c**

$C_{30}H_{30}N_4OV$ , fw 513.53, crystal dimensions 0.10 x 0.10 x 0.02 mm, triclinic, space group P-1 (#2),  $a = 9.4833(6)$  Å,  $b = 11.1878(6)$  Å,  $c = 12.2682(7)$  Å,  $\alpha = 82.029(3)^\circ$ ,  $\beta = 71.105(3)^\circ$ ,  $\gamma = 82.285(3)^\circ$ ,  $V = 1214.03(11)$  Å<sup>3</sup>,  $Z = 2$ , CuK $\alpha$  radiation ( $\lambda = 1.54187$  Å),  $D_{\text{calc}} = 1.405$  g cm<sup>-3</sup>,  $\mu(\text{CuK}\alpha) = 36.638$  cm<sup>-1</sup>, 10950 measured reflections, 4238 unique reflections [ $R_{\text{int}} = 0.116$ ], 4238 reflections included in the refinement,  $R1 = 0.1030$  [ $I > 2.00 \sigma(I)$ ],  $wR2 = 0.3441$  (all reflections). Crystallographic data for the structural analysis have been deposited with the Cambridge Crystallographic Data Centre (CCDC No. 668112). This information can be obtained free of charge from [www.ccdc.cam.ac.uk](http://www.ccdc.cam.ac.uk).

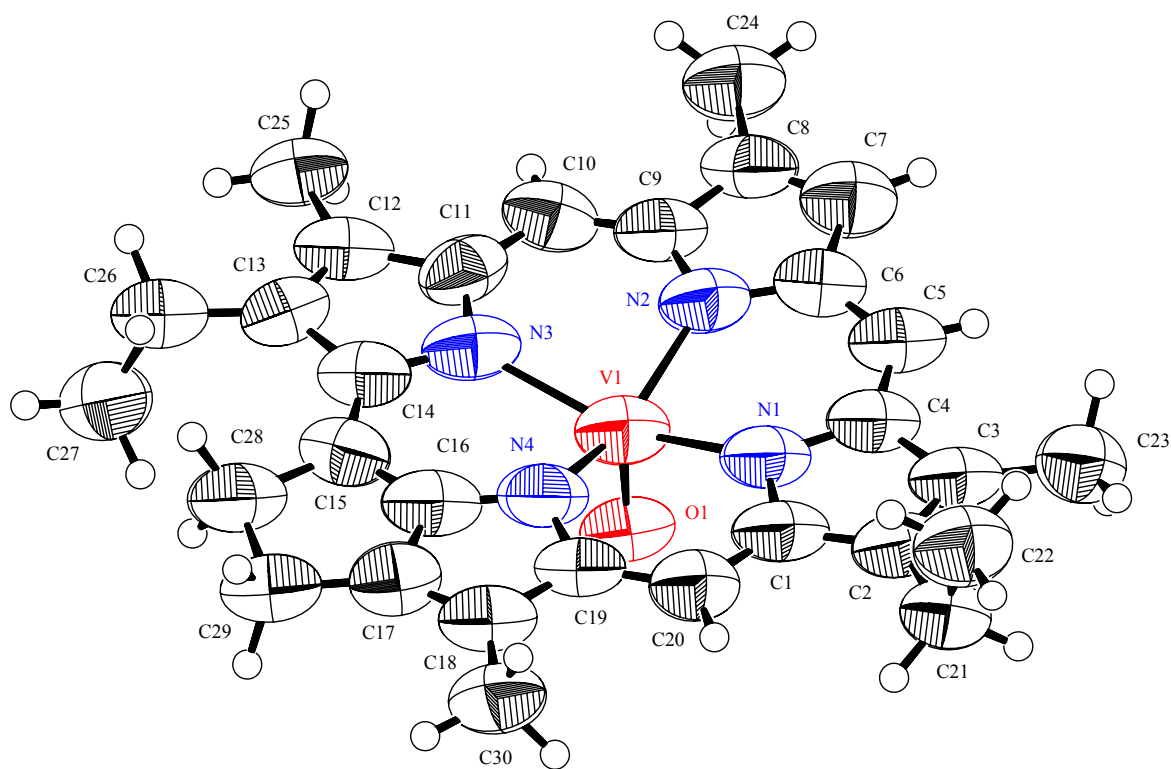

## Compound 1e

$C_{30}H_{30}N_4OV$ , fw 513.53, crystal dimensions 0.10 x 0.10 x 0.04 mm, triclinic, space group P-1 (#2),  $a = 9.6551(3)$  Å,  $b = 10.9130(3)$  Å,  $c = 12.2787(3)$  Å,  $\alpha = 81.7071(17)^\circ$ ,  $\beta = 74.0418(15)^\circ$ ,  $\gamma = 82.7403(18)^\circ$ ,  $V = 1225.77(6)$  Å<sup>3</sup>,  $Z = 2$ , CuK $\alpha$  radiation ( $\lambda = 1.54187$  Å),  $D_{\text{calc}} = 1.391$  g cm<sup>-3</sup>,  $\mu(\text{CuK}\alpha) = 36.287$  cm<sup>-1</sup>, 13897 measured reflections, 4387 unique reflections [ $R_{\text{int}} = 0.062$ ], 4387 reflections included in the refinement,  $R1 = 0.0664$  [ $I > 2.00 \sigma(I)$ ],  $wR2 = 0.1934$  (all reflections). Crystallographic data for the structural analysis have been deposited with the Cambridge Crystallographic Data Centre (CCDC No. 668111). This information can be obtained free of charge from [www.ccdc.cam.ac.uk](http://www.ccdc.cam.ac.uk).

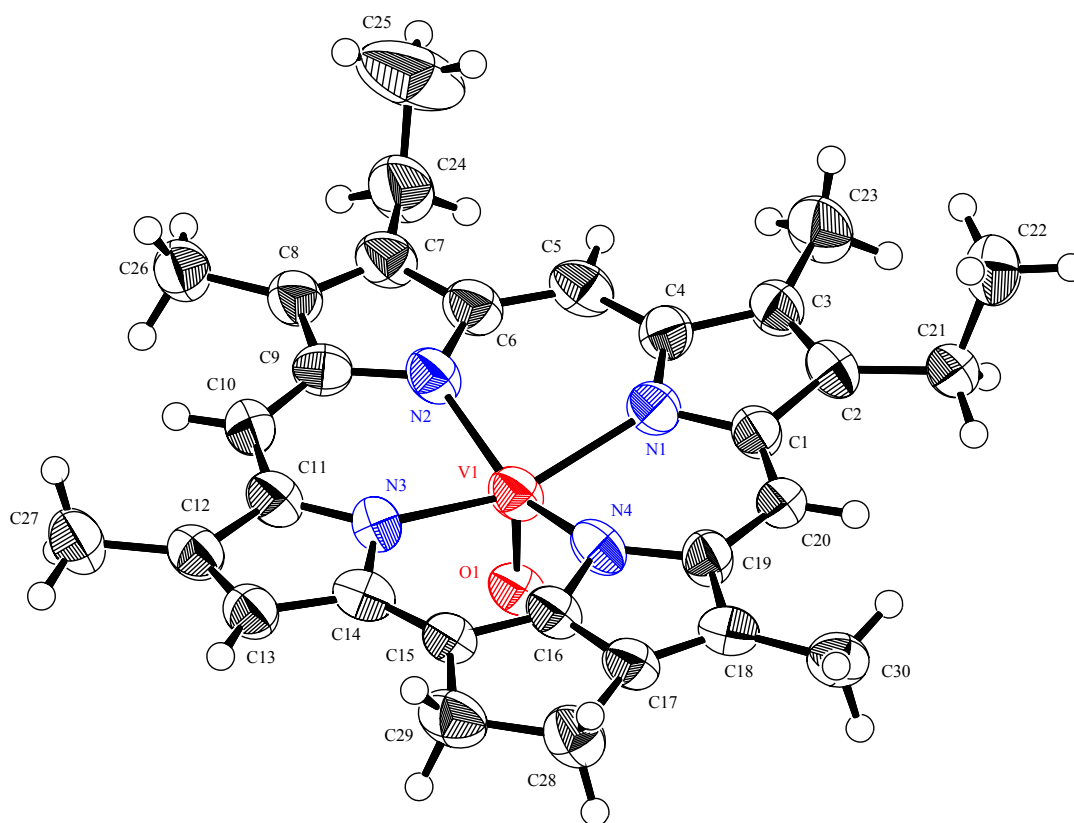

## Compound 2

We obtained preliminary crystallographic information for Compounds **2**, which suggests that the crystal consists of a one-to-one pair of diastereomers of  $C_{33}$  bicycloalkanoporphyrin (biCAP). Namely, the two structures illustrated below are suggested to be present in the analyzed crystal with equal probability. The analysis also indicates that carbon atoms at C-13 and C-13A, as well as those at C-15 or C-15A, are present with equal probability, and that each diastereomer has only one of each pair (C-13 or C-13A, and C-15 or C-15A) in its structure. Considering the subcultures of naturally occurring tetrapyrroles, we concluded the chemical structure of Compounds **2** to be that shown in the Appendix figures.

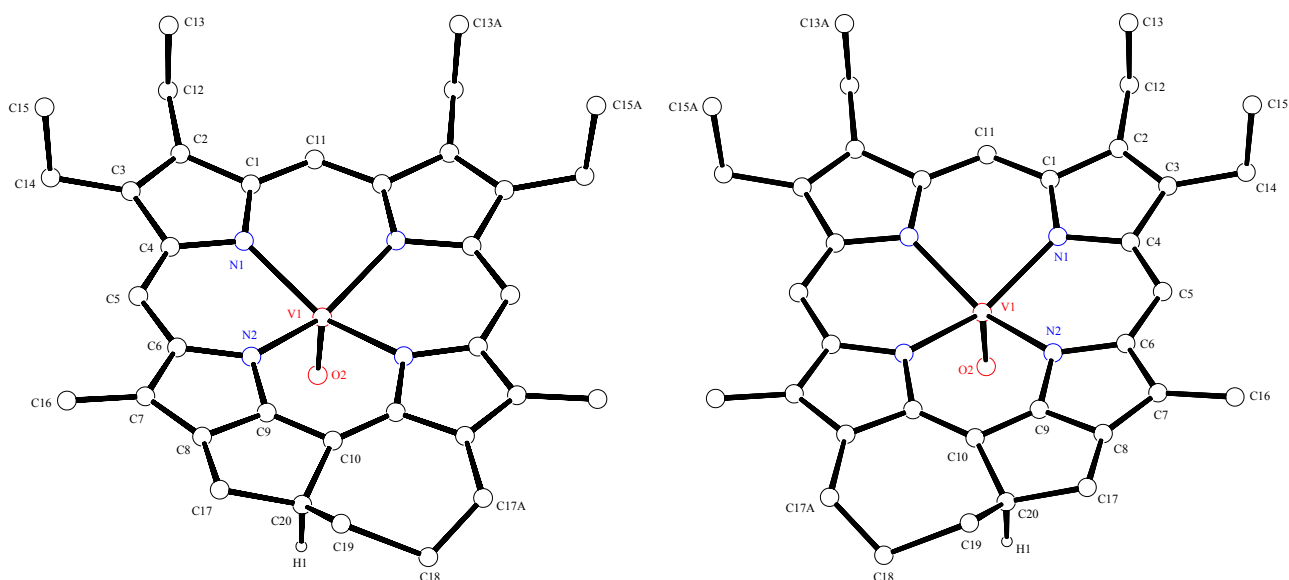

## (2) Student's *t* test

Table S1. Student's *t* test examining if  $\delta^{15}\text{N}$  and  $\delta^{13}\text{C}$  values of porphyrins (**1e-e** and **2**; numbers referring to structures in Appendix A) are different from those of DPEP (**1a**) at a significance level of 0.05. The test indicates that: (1) Compound **1c** are not statistically distinguished from DPEP in both  $\delta^{15}\text{N}$  and  $\delta^{13}\text{C}$ ; (2) Compound **1d** and **1e** are statistically distinguished from DPEP in  $\delta^{13}\text{C}$ ; and (3) Compound **2** are statistically distinguished from DPEP in both  $\delta^{15}\text{N}$  and  $\delta^{13}\text{C}$ .

| Compounds | Samples               |        |      |      |      | $\bar{x}$ | $s^2$ | $s'^2$ | $t_{\text{calc}}$ | $n-1$  | $t$<br>( $P=0.05$ ) | Choice of hypotheses* |        |
|-----------|-----------------------|--------|------|------|------|-----------|-------|--------|-------------------|--------|---------------------|-----------------------|--------|
|           | BA138b                | BA140a | III  | IV   | V    |           |       |        |                   |        |                     |                       | GJ01-7 |
| <b>1c</b> | $\delta^{15}\text{N}$ | 0.0    | -0.9 | 0.4  | 0.6  | (n/a)     | -0.4  | 0.39   | 0.30              | -0.28  | 4                   | 2.78                  | $H_0$  |
|           | $\delta^{13}\text{C}$ | 0.1    | 0.8  | -0.1 | 0.5  | (n/a)     | 0.0   | 0.15   | 0.06              | 2.42   | 4                   | 2.78                  | $H_0$  |
| <b>1d</b> | $\delta^{15}\text{N}$ | 2.3    | 4.0  | -1.0 | -0.3 | (n/a)     | 3.1   | 4.73   | 4.64              | 1.68   | 4                   | 2.78                  | $H_0$  |
|           | $\delta^{13}\text{C}$ | -4.1   | -1.9 | -4.2 | -2.5 | (n/a)     | -1.6  | 1.54   | 1.45              | -5.30  | 4                   | 2.78                  | $H_1$  |
| <b>1e</b> | $\delta^{15}\text{N}$ | -0.1   | -0.5 | 1.4  | -0.5 | 2.8       | -0.1  | 1.65   | 1.56              | 0.73   | 6                   | 2.45                  | $H_0$  |
|           | $\delta^{13}\text{C}$ | 0.4    | 0.6  | 0.9  | 1.3  | 0.5       | 0.2   | 0.13   | 0.04              | 8.49   | 6                   | 2.45                  | $H_1$  |
| <b>2</b>  | $\delta^{15}\text{N}$ | -1.5   | -1.7 | -1.3 | -0.7 | -0.7      | -0.9  | 0.41   | 0.32              | -4.43  | 6                   | 2.45                  | $H_1$  |
|           | $\delta^{13}\text{C}$ | -2.5   | -2.1 | -1.9 | -1.6 | -3.0      | -2.7  | 0.23   | 0.14              | -16.19 | 6                   | 2.45                  | $H_1$  |

\*Hypotheses tested herein are as follows:

$$H_0: \mu = \mu_0 = 0 \text{ (null hypothesis)}$$

$$H_1: \mu \neq \mu_0 = 0 \text{ (alternative hypothesis)}$$

where  $\mu$  denotes the population mean (the "true" mean) of the *difference* in isotopic values between each compound and DPEP. Therefore,  $H_0$ , indicating that null hypothesis was not rejected, suggests that the isotopic value is statistically indistinguishable from that of DPEP;  $H_1$ , indicating that null hypothesis was rejected, suggests that the isotopic value is statistically distinguished from that of DPEP.

\*\*Definition of symbols:

$\bar{x}$ : sample mean.

$s^2$ : sample variance including the variance of analytical error.

$s'^2$ : estimated sample variance that is attributed to the population variance (the "true" variance) after excluding the variance of analytical error ( $s_{\text{error}}^2 = 0.3^2$ ) because  $s^2 = s'^2 + s_{\text{error}}^2$ .

$t_{\text{calc}}$ : Student's *t* variable calculated from  $\bar{x}$  and  $s'^2$ ;  $t_{\text{calc}} = (\bar{x} - \mu_0) / (s'^2 / n)^{0.5}$ , where  $\mu_0 = 0$ .

$n-1$ : degree of freedom.

$t$  ( $P=0.05$ ): the critical value of  $t$  corresponding to given  $\nu$  at a significance level of 0.05.  $H_0$  would be rejected if  $|t_{\text{calc}}| > t$  ( $P=0.05$ ).

Table S2. Student's  $t$  test examining if  $\delta^{15}\text{N}$  and  $\delta^{13}\text{C}$  values of porphyrins (**1a**, **c**, **d** and **2**, numbers referring to structures in Appendix A) are different from those of 17-nor-DPEP (**1e**) at a significance level of 0.05. The test indicates that: (1) Compound **1a**, **c**, **d** are statistically distinguished from 17-nor-DPEP in  $\delta^{13}\text{C}$ ; and (3) Compound **2** are statistically distinguished from 17-nor-DPEP in both  $\delta^{15}\text{N}$  and  $\delta^{13}\text{C}$ .

| Compounds | Samples               |        |      |      |        |       |       |        |      |      | $\bar{x}$ | $s^2$    | $s'^2$ | $t_{\text{calc}}$ | $n-1$ | $t$<br>( $P=0.05$ ) | Choice of hypotheses* |
|-----------|-----------------------|--------|------|------|--------|-------|-------|--------|------|------|-----------|----------|--------|-------------------|-------|---------------------|-----------------------|
|           | BA138b                | BA140a |      |      | GJ01-7 |       |       | GJ01-3 |      |      |           |          |        |                   |       |                     |                       |
|           |                       | III    | IV   | V    |        |       |       |        |      |      |           |          |        |                   |       |                     |                       |
| <b>1a</b> | $\delta^{15}\text{N}$ | 0.1    | 0.5  | -1.4 | 0.5    | -2.8  | 0.1   | 0.7    | -0.3 | 1.65 | 1.56      | -0.73    | 6      | 2.45              | $H_0$ |                     |                       |
|           | $\delta^{13}\text{C}$ | -0.4   | -0.6 | -0.9 | -1.3   | -0.5  | -0.2  | -0.5   | -0.6 | 0.13 | 0.04      | -8.49    | 6      | 2.45              | $H_1$ |                     |                       |
| <b>1c</b> | $\delta^{15}\text{N}$ | 0.1    | -0.4 | -1.0 | 1.1    | (n/a) | (n/a) | 0.3    | 0.0  | 0.61 | 0.52      | 0.00     | 4      | 2.78              | $H_0$ |                     |                       |
|           | $\delta^{13}\text{C}$ | -0.3   | 0.2  | -1.0 | -0.8   | (n/a) | (n/a) | -0.6   | -0.5 | 0.20 | 0.11      | -3.24    | 4      | 2.78              | $H_1$ |                     |                       |
| <b>1d</b> | $\delta^{15}\text{N}$ | 2.3    | 4.5  | -2.4 | 0.2    | (n/a) | (n/a) | 3.8    | 1.7  | 7.87 | 7.78      | 1.35     | 4      | 2.78              | $H_0$ |                     |                       |
|           | $\delta^{13}\text{C}$ | -4.5   | -2.5 | -5.1 | -3.8   | (n/a) | (n/a) | -2.1   | -3.6 | 1.65 | 1.56      | -6.43    | 4      | 2.78              | $H_1$ |                     |                       |
| <b>2</b>  | $\delta^{15}\text{N}$ | -1.4   | -1.2 | -2.7 | -0.2   | -3.5  | -0.8  | 0.9    | -1.3 | 2.17 | 2.08      | -2.36    | 6      | 2.45              | $H_1$ |                     |                       |
|           | $\delta^{13}\text{C}$ | -2.9   | -2.7 | -2.7 | -2.9   | -3.5  | -2.9  | -3.0   | -3.0 | 0.06 | 0***      | $\infty$ | 6      | 2.45              | $H_1$ |                     |                       |

\*Hypotheses tested herein are as follows:

$H_0: \mu = \mu_0 = 0$  (null hypothesis)

$H_1: \mu \neq \mu_0 = 0$  (alternative hypothesis)

where  $\mu$  denotes the population mean (the "true" mean) of the *difference* in isotopic values between each compound and 17-nor-DPEP. Therefore,  $H_0$ , indicating that null hypothesis was not rejected, suggests that the isotopic value is statistically indistinguishable from that of 17-nor-DPEP;  $H_1$ , indicating that null hypothesis was rejected, suggests that the isotopic value is statistically distinguished from that of 17-nor-DPEP.

\*\*Definition of symbols refer to those in Table S1.

\*\*\*Because  $s^2$  is smaller than estimated variance of the analytical error, the true variance is estimated to be null.

### (3) Estimation of the degree of overall isotopic fractionation during photosynthesis ( $\epsilon_p$ )

In the present work,  $\epsilon_p$ , the overall isotopic fractionation, is defined as:

$$\epsilon_p = 10^3 [(\delta^{13}\text{C}_{\text{cell}} + 1000)/(\delta^{13}\text{C}_{\text{CO}_2\text{aq}} + 1000) - 1] \approx \delta_{\text{cell}} - \delta_{\text{d}} (\text{‰})$$

where  $\delta_{\text{cell}}$  and  $\delta_{\text{d}}$  denote  $\delta^{13}\text{C}$  values of the whole cell of photoautotrophs and  $\text{CO}_2\text{aq}$ , respectively.  $\delta_{\text{d}}$  can be calculated as follows:

$$\delta_{\text{d}} = \delta_{\text{c}} + (\epsilon_{\text{b/c}} + \epsilon_{\text{d/b}}) (\text{‰})$$

where  $\delta_{\text{c}}$ ,  $\epsilon_{\text{b/c}}$ , and  $\epsilon_{\text{d/b}}$  denote  $\delta^{13}\text{C}$  values of carbonate ( $\text{CO}_3^{2-}$ ), equilibrium isotopic discrimination between  $\text{CO}_3^{2-}$  and  $\text{HCO}_3^-$ , and equilibrium isotopic discrimination between  $\text{HCO}_3^-$  and  $\text{CO}_2\text{aq}$ , respectively.  $\epsilon_{\text{b/c}}$  and  $\epsilon_{\text{d/b}}$  are functions of temperature ( $T$ ), and the following relationships are known (Thode et al., 1965; Mook et al., 1965):

$$\begin{aligned}\epsilon_{\text{b/c}} &= [653.627/(T - 233.45)^2] + 0.22 (\text{‰}) \\ \epsilon_{\text{d/b}} &= 24.12 - 9866/T (\text{‰})\end{aligned}$$

Therefore,  $\delta_{\text{d}}$  can be estimated from  $\delta_{\text{c}}$  and  $T$  as follows:

$$\delta_{\text{d}} = \delta_{\text{c}} + ([653.627/(T - 233.45)^2] + 0.22) + 24.12 - 9866/T (\text{‰})$$

$\delta_{\text{c}}$  for surface water in the Onnagawa basin is difficult to explicitly evaluate because primary carbonate is not preserved. The  $\delta_{\text{c}}$  of shallow-dwelling planktonic foraminifera of the middle Miocene age (9-13Ma) indicates that the  $\delta_{\text{c}}$  was approximately 1‰ higher than that from the modern surface ocean (e.g., Kennett, 1986; Woodruff and Savin, 1989, 1991; Hodell and Vayavananda, 1994; Pagani et al., 1999a, 1999b).  $T$  in the Onnagawa basin (i.e., sea surface temperature; SST) was assumed to be in the range of 10-20°C. The results of calculation are shown in the Table 4 of the main text.
